# Supplementary material for: Microscopic characterization and strength characteristics of cemented backfill under different humidity curing conditions
Source: R Soc Open Sci. 2019 Dec 4;6(12):191227. doi: 10.1098/rsos.191227 (PMC6936273; doi:10.1098/rsos.191227)
Supplement: Uniaxial compressive strength data [file rsos191227supp3.xlsx]

## Sheet: UCS
Group	UCS（Mpa)	UCS（Mpa)	UCS（Mpa)	UCS（Mpa)
	0	0.3	0.7	0.99
A1	4.31	4.22	2.42	3.2
A2	4.14	4.38	2.21	1.92
A3	3.77	3.81	2.13	1.93
A4	3.94	3.7	1.6	1.66
A5	3.46	3.1	1.12	1.58
A6	3.28	2.16	1.05	1.39
A7	2.24	2.12	0.9	0.93
A8	1.2	0.96	0.35	0.65
